# Supplementary material
Source: publisher figshare collection journal article supplement (https://plos.figshare.com/ndownloader/files/40892999)
Supplement: Supplementary file [file 40892999]

**S3 Table: Comparison between scaling exponent of RMSD and scaling exponent of mixing index**

| Type                      | LJ strength<br>$\epsilon$                     | $\lambda/2$<br>(for $\phi = 0.4$ ) | $\lambda/2$<br>(unconfined) | $\beta$<br>(for $\phi = 0.4$ ) |
|---------------------------|-----------------------------------------------|------------------------------------|-----------------------------|--------------------------------|
| Polymer in good solvent   | $\epsilon = 0.25 \text{ k}_\text{B} \text{T}$ | $\lambda/2 = 0.2$                  | $\lambda/2 = 0.25$          | $\beta = 0.25$                 |
| Polymer in poor solvent   | $\epsilon = 0.5 \text{ k}_\text{B} \text{T}$  | $\lambda/2 = 0.2$                  | $\lambda/2 = 0.125$         | $\beta = 0.22$                 |
| Polymer melts (reptation) | $\epsilon = 0.75 \text{ k}_\text{B} \text{T}$ |                                    | $\lambda/2 = 0.125$         | $\beta = 0.13$                 |
| Polymer melts (“jammed”)  | $\epsilon = 1 \text{ k}_\text{B} \text{T}$    |                                    | $\lambda/2 = 0.125$         | $\beta = 0.076$                |

**Table:** RMSD ( $\sqrt{\langle r^2 \rangle} \sim \tau^{\lambda/2}$ ) and chromosome mixing index ( $\alpha \sim t^\beta$ )
